# Supplementary material
Source: Springer Nature journal article supplement (https://www.springermedizin.de/resource/supplementary/12943_2012_1091_MOESM5_ESM.pdf/9552326)
Supplement: MOESM5 [file 9552326]

| Supplementary Table 4. Putative androgen-related receptor binding sites in R1881-reponsive UC regions |               |                |              |                   |                            |        |
|-------------------------------------------------------------------------------------------------------|---------------|----------------|--------------|-------------------|----------------------------|--------|
| UC region                                                                                             | Binding Site  | Start position | End position | Matrix Similarity | Sequence                   | Strand |
| uc.134                                                                                                | GRE.01        | 675            | 693          | 0.856             | gagttattatatGTGCtta        | +      |
| uc.135                                                                                                | ARE.02        | 807            | 825          | 0.923             | ctgccacttggtGTACTga        | +      |
| uc.135                                                                                                | GRE.02        | 807            | 825          | 0.851             | tcaGTACaccaagtgccag        | -      |
| uc.135                                                                                                | GRE.02        | 2032           | 2050         | 0.842             | aatGCACattgtgtattct        | +      |
| uc.204                                                                                                | GRE.03        | 1047           | 1065         | 0.893             | ttcctcctgtaTGTTctga        | -      |
| uc.204                                                                                                | GRE.03        | 1460           | 1478         | 0.893             | gcggtcacgtTGTTcaga         | -      |
| uc.204                                                                                                | ARE.03        | 1666           | 1684         | 0.892             | tgtccacgggctGTCCtcc        | +      |
| uc.204                                                                                                | PRE.01        | 989            | 1007         | 0.885             | tttggctttgtTGTTcttg        | +      |
| uc.204                                                                                                | GRE.02        | 1666           | 1684         | 0.849             | ggaGGACagcccgtggaca        | -      |
| uc.204                                                                                                | GRE.02        | 1786           | 1804         | 0.839             | gcgGGACagggcagtgcca        | -      |
| uc.240                                                                                                | ARE.03        | 578            | 596          | 0.891             | gctgatccagatGTCCtta        | +      |
| uc.240                                                                                                | PRE.01        | 100            | 118          | 0.89              | aggtgcccaacTGTTctga        | +      |
| uc.240                                                                                                | PRE.01        | 1226           | 1244         | 0.887             | agagccgaggaTGTTcttt        | -      |
| uc.240                                                                                                | PRE.01        | 564            | 582          | 0.882             | tcagcctcggTGTTcttg         | -      |
| uc.240                                                                                                | ARE.03        | 747            | 765          | 0.872             | ttaggaaattgtGTACTtc        | +      |
| uc.240                                                                                                | ARE.03        | 1101           | 1119         | 0.871             | ctgtctcagctGTGCtaa         | -      |
| uc.240                                                                                                | GRE.02        | 493            | 511          | 0.863             | ctgGTACacgcggcatct         | -      |
| uc.240                                                                                                | GRE.02        | 455            | 473          | 0.848             | tggGTACacatggtattta        | -      |
| uc.240                                                                                                | GRE.02        | 578            | 596          | 0.835             | taaGGACatctggatcagc        | -      |
| uc.240                                                                                                | GRE.02        | 747            | 765          | 0.826             | gaaGTACacaattcctaa         | -      |
| uc.249                                                                                                | ARE.02        | 1382           | 1400         | 0.895             | tgatttcctctGTTcct          | +      |
| uc.249                                                                                                | GRE.03        | 2219           | 2237         | 0.889             | acacctcactcTGTTccag        | -      |
| uc.249                                                                                                | PRE.01        | 86             | 104          | 0.879             | catatatgtagTGTTctca        | +      |
| uc.249                                                                                                | ARE.03        | 2657           | 2675         | 0.871             | ctcgcataaaatGTGCtta        | +      |
| uc.249                                                                                                | PRE.01        | 2298           | 2316         | 0.869             | tgagaggctcaTGTTctgt        | +      |
| uc.283                                                                                                | GRE.01        | 1102           | 1120         | 0.869             | aagtttgattttGTTccta        | +      |
| <b>uc.287</b>                                                                                         | <b>ARE.02</b> | <b>1259</b>    | <b>1277</b>  | <b>0.922</b>      | <b>gtcttgctgctGTTccta</b>  | -      |
| <b>uc.287</b>                                                                                         | <b>GRE.03</b> | <b>1164</b>    | <b>1182</b>  | <b>0.914</b>      | <b>aaagtgccaaaTGTTctgc</b> | -      |
| <b>uc.287</b>                                                                                         | <b>GRE.03</b> | <b>1464</b>    | <b>1482</b>  | <b>0.892</b>      | <b>tccttccagatTGTTccca</b> | -      |
| <b>uc.287</b>                                                                                         | <b>GRE.03</b> | <b>152</b>     | <b>170</b>   | <b>0.886</b>      | <b>ttgtcctccgTGTTcact</b>  | +      |
| <b>uc.287</b>                                                                                         | <b>GRE.01</b> | <b>143</b>     | <b>161</b>   | <b>0.862</b>      | <b>gcagtaactttGTCCtcc</b>  | +      |
| <b>uc.287</b>                                                                                         | <b>ARE.01</b> | <b>2079</b>    | <b>2097</b>  | <b>0.834</b>      | <b>ctagaacccaTGTTgtct</b>  | +      |
| <b>uc.287</b>                                                                                         | <b>GRE.02</b> | <b>1164</b>    | <b>1182</b>  | <b>0.822</b>      | <b>gcaGAACattggcacttt</b>  | +      |
| uc.31                                                                                                 | ARE.02        | 2214           | 2232         | 0.931             | ttttgcctcctGTTctt          | -      |
| uc.31                                                                                                 | GRE.03        | 265            | 283          | 0.899             | tatgctcggcaTGTTccag        | +      |
| uc.344                                                                                                | GRE.01        | 2240           | 2258         | 0.853             | aacgtcactctGTCCtgg         | +      |
| uc.349                                                                                                | PRE.01        | 503            | 521          | 0.852             | ttatgtttaaTGTTctat         | -      |
| uc.410                                                                                                | GRE.01        | 2240           | 2258         | 0.853             | aacgtcactctGTCCtgg         | +      |
| uc.445                                                                                                | ARE.03        | 279            | 297          | 0.899             | ctgttcccactGTGCtga         | -      |
| uc.445                                                                                                | ARE.03        | 2842           | 2860         | 0.893             | ggtgcacaggctGTGCact        | +      |
| uc.445                                                                                                | GRE.02        | 2842           | 2860         | 0.89              | agtGCACagcctgtgcaac        | -      |
| uc.445                                                                                                | GRE.01        | 146            | 164          | 0.85              | tgtgtggggtgtGTCCtgt        | -      |
| uc.445                                                                                                | GRE.02        | 279            | 297          | 0.821             | tcaGCACagtggaacaag         | +      |
| uc.445                                                                                                | GRE.02        | 2514           | 2532         | 0.821             | gttGCACagtggtctgtg         | +      |

Note: Search included UC regions and corresponding 1kb flanking sequences of ucRNAs found to be altered in R1881-treated cells, using Genomatix software (München, Germany). Genomatix matrix family (V\$GREF) included the androgen receptor binding sites and related glucocorticoid responsive elements: ARE.01: RGNACRnngTGTTCT; ARE.02: DNWCWtnnTGTYCT; PRE.01: GNACNknTGTTCT; GRE.01:
